# Supplementary material
Source: Springer Nature journal article supplement (https://www.springermedizin.de/resource/supplementary/12871_2014_250_MOESM2_ESM.pdf/9429240)

# *Intraoperative fluid approach*

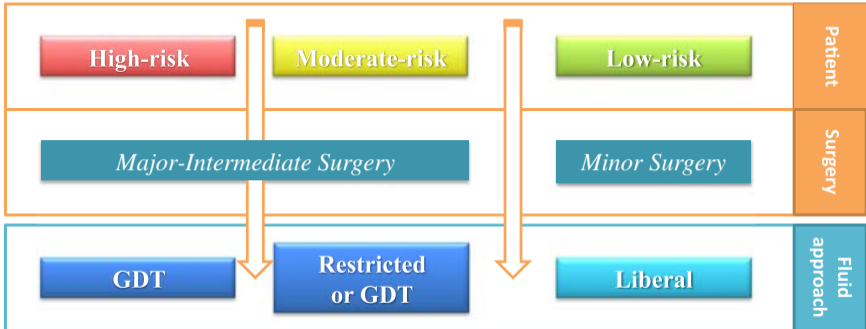

Supplement: MOESM2 [file 9429240]
